# Supplementary material for: Construction of Household Welfare Index and Welfare Impact of International Remittances in Rural Bangladesh
Source: Preprints.org preprint supplement (doi:10.20944/preprints202105.0551.v1), 2021-05-24
Supplement: Supplementary file 2 [file supplementary]

## Sheet: SheetA
		total exp						per capita exp
hs	food and non-food	houe	edu	hel	invest		food and non-food	house	edu	hel	invest	PCE		CI	AC	EI	HI	II	HWI
3	80260	120000	2000	2560	3720.86		26753.3	40000	666.667	853.333	1240.29	69513.6		0.383721	0.961754	0.339999	0.465559	0.725069	0.531352
10	185110	12500	100000	7000	4197.36		18511	1250	10000	700	419.736	30880.7		0.290529	0.401017	0.853867	0.422549	0.505406	0.462862
10	183950	18563	6000	1000	14836.6		18395	1856.3	600	100	1483.66	22435		0.288938	0.464997	0.320006	0	0.761393	0
4	53220	9520	6500	4000	7841.28		13305	2380	1625	1000	1960.32	20270.3		0.20697	0.505206	0.509066	0.5	0.817875	0.465116
4	72450	8974	12000	4580	7355.9		18112.5	2243.5	3000	1145	1838.98	26340		0.285022	0.495649	0.625406	0.529403	0.804921	0.51898
6	75678	128000	1240	3000	11051.6		12613	21333.3	206.667	500	1841.93	36494.9		0.193455	0.860048	0.11776	0.349485	0.805246	0.35342
9	81000	144000	1000	2000	9950.88		9000	16000	111.111	222.222	1105.65	26439		0.108054	0.813503	1.89757e-06	0.173394	0.701772	0.0289391
4	37650	96000	1000	8560	5190		9412.5	24000	250	2140	1297.5	37100		0.119394	0.879105	0.153881	0.665207	0.734211	0.379662
7	468865	25630	8000	2000	2341.77		66980.7	3661.43	1142.86	285.714	334.539	72405.3		0.615944	0.574899	0.442277	0.227966	0.45941	0.439521
5	74200	240000	8620	20000	6557.09		14840	48000	1724	4000	1311.42	69875.4		0.234598	0.991252	0.520288	0.80103	0.736374	0.589793
5	88440	5681	48000	2000	6251.26		17688	1136.2	9600	400	1250.25	30074.5		0.279021	0.385573	0.846121	0.30103	0.726691	0.456906
5	67590	104000	6000	2000	5184.29		13518	20800	1200	400	1036.86	36954.9		0.210989	0.855952	0.451535	0.30103	0.688748	0.442195
4	62630	84230	12000	1000	5598.48		15657.5	21057.5	3000	250	1399.62	41364.6		0.248167	0.857943	0.625406	0.19897	0.749571	0.45666
4	101800	16320	12000	20000	6837.12		25450	4080	3000	5000	1709.28	39239.3		0.371083	0.592412	0.625406	0.849485	0.790093	0.620895
5	103180	1200	1250	5600	8246.16		20636	240	250	1120	1649.23	23895.2		0.318027	0.134014	0.153881	0.524609	0.782842	0.30624
3	414896	176000	2000	2000	1937.38		138299	58666.7	666.667	666.667	645.792	198944		0.799398	1.02372	0.339999	0.411954	0.592757	0.584022
4	467000	125896	27200	3000	717.216		116750	31474	6800	750	179.304	155953		0.756538	0.922969	0.780686	0.437531	0.332968	0.602533
4	100596	184000	1230	1000	6542.38		25149	46000	307.5	250	1635.59	73342.1		0.368073	0.984366	0.193163	0.19897	0.781159	0.404863
3	42000	5632	2400	3000	8793.58		14000	1877.33	800	1000	2931.19	20608.5		0.219854	0.46682	0.374595	0.5	0.899438	0.444178
4	322400	54123	4800	7800	1675.9		80600	13530.8	1200	1950	418.974	97699.7		0.662779	0.786382	0.451535	0.645017	0.505038	0.598298
4	132118	2880	6200	12000	9012.19		33029.5	720	1550	3000	2253.05	40552.5		0.437046	0.311763	0.5001	0.738561	0.846092	0.531915
4	237360	2563	6000	3500	3520.25		59340	640.75	1500	875	880.062	63235.8		0.585296	0.292896	0.493878	0.471004	0.655507	0.482461
14	145360	5421	6000	5000	4977.43		10382.9	387.214	428.571	357.143	355.531	11911.3		0.144221	0.211407	0.256158	0.276421	0.471749	0.252108
4	340688	6895	48000	2000	9559.63		85172	1723.75	12000	500	2389.91	101786		0.67674	0.453011	0.888464	0.349485	0.858048	0.60593
4	59908	4521	48000	1000	8711.78		14977	1130.25	12000	250	2177.95	30535.2		0.236923	0.384723	0.888464	0.19897	0.839219	0.422875
6	155500	80000	1480	3000	7731.12		25916.7	13333.3	246.667	500	1288.52	41285.2		0.375681	0.784004	0.151334	0.349485	0.732803	0.408788
4	58760	5862	7200	5000	8608.66		14690	1465.5	1800	1250	2152.16	21357.7		0.232027	0.426751	0.528474	0.548455	0.836804	0.474352
4	52070	6587	1520	8960	6973.51		13017.5	1646.75	380	2240	1743.38	19027.6		0.201442	0.445617	0.233333	0.675124	0.794098	0.407445
6	346550	8965	3600	12000	7624.87		57758.3	1494.17	600	2000	1270.81	63123.3		0.57846	0.429885	0.320006	0.650515	0.729998	0.519365
5	218000	60000	1360	3500	10059.4		43600	12000	272	700	2011.87	58583.9		0.507303	0.766958	0.169885	0.422549	0.823138	0.470228
7	273540	176000	36000	1700	12545.5		39077.1	25142.9	5142.86	242.857	1792.22	71397.9		0.479591	0.886632	0.727684	0.192675	0.799699	0.544079
3	111050	12363	48000	12000	5439.29		37016.7	4121	16000	4000	1813.1	62950.8		0.465884	0.59403	0.943053	0.80103	0.802047	0.699672
4	55800	2363	1230	6000	7635.91		13950	590.75	307.5	1500	1908.98	18257.2		0.218948	0.279751	0.193163	0.588046	0.812495	0.355184
4	116940	51200	24000	1268	5760.77		29235	12800	6000	317	1440.19	49792.2		0.406167	0.7774	0.756935	0.25053	0.755365	0.538375
4	69650	12563	9400	20000	7691.71		17412.5	3140.75	2350	5000	1922.93	29826.2		0.275049	0.550081	0.579069	0.849485	0.813971	0.570777
5	142900	160000	20000	3000	7935		28580	32000	4000	600	1587	66767		0.400433	0.92565	0.679996	0.389076	0.775044	0.597267
5	366050	56470	1850	3000	3759.84		73210	11294	370	600	751.968	86226		0.638446	0.757147	0.228273	0.389076	0.623617	0.484777
6	130700	12560	1250	12500	7603.92		21783.3	2093.33	208.333	2083.33	1267.32	27435.7		0.331718	0.48444	0.119284	0.659379	0.72944	0.391691
4	62600	5201	6000	5600	6728.04		15650	1300.25	1500	1400	1682.01	21532.3		0.248045	0.407394	0.493878	0.573064	0.786832	0.46822
7	83200	1230	6000	5000	7059.84		11885.7	175.714	857.143	714.286	1008.55	14641.4		0.178427	0.0835699	0.387687	0.426936	0.683136	0.278851
5	85900	1650	1520	20000	7314.86		17180	330	304	4000	1462.97	23277		0.271647	0.185538	0.190991	0.80103	0.758546	0.357616
4	35100	1080	1650	4850	7609.92		8775	270	412.5	1212.5	1902.48	12572.5		0.101648	0.153071	0.248906	0.541841	0.811804	0.279428
4	46450	32000	14400	15000	12536.4		11612.5	8000	3600	3750	3134.1	30096.6		0.172542	0.701356	0.660003	0.787016	0.913008	0.564635
2	597260	2601	1200	12000	7222.54		298630	1300.5	600	6000	3611.27	310142		0.994183	0.407425	0.320006	0.889076	0.941739	0.641369
7	47000	5620	7200	1000	8378.3		6714.29	802.857	1028.57	142.857	1196.9	9885.47		0.0339176	0.329387	0.422284	0.077451	0.717849	0.192203
3	51100	48000	3200	3000	6555.84		17033.3	16000	1066.67	1000	2185.28	37285.3		0.269478	0.813503	0.429185	0.5	0.8399	0.524016
8	605200	56230	1000	1500	5659.92		75650	7028.75	125	187.5	707.49	83698.7		0.646741	0.680414	0.0223519	0.136501	0.611256	0.241455
3	96360	7896	6200	1620	9909.22		32120	2632	2066.67	540	3303.07	40661.7		0.429981	0.521489	0.554689	0.366197	0.923654	0.530632
3	68400	8654	4860	1200	9523.04		22800	2884.67	1620	400	3174.35	30879		0.34326	0.53632	0.508481	0.30103	0.915595	0.481202
4	59700	2563	25000	1620	6580.92		14925	640.75	6250	405	1645.23	23866		0.236043	0.292896	0.764681	0.303728	0.78235	0.416691
5	120340	4125	12000	12000	13182.8		24068	825	2400	2400	2636.57	32329.6		0.356955	0.333789	0.583064	0.690106	0.877961	0.530687
5	91900	1256	3600	15000	6150.82		18380	251.2	720	3000	1230.16	23581.4		0.288732	0.141394	0.354603	0.738561	0.723407	0.37817
5	100100	5200	5000	14850	9344.54		20020	1040	1000	2970	1868.91	26898.9		0.310358	0.371259	0.416938	0.736378	0.808194	0.491186
4	132800	12363	1580	23000	19254		33200	3090.75	395	5750	4813.51	47249.3		0.438349	0.547485	0.24068	0.879834	1	0.55107
4	83700	144000	12000	2000	11331.6		20925	36000	3000	500	2832.9	63257.9		0.321546	0.944707	0.625406	0.349485	0.892523	0.568264
4	50434	14563	3600	4500	15890		12608.5	3640.75	900	1125	3972.5	22246.7		0.193364	0.573983	0.396945	0.525576	0.961068	0.467175
4	55855	36523	14000	5000	7797.65		13963.8	9130.75	3500	1250	1949.41	29793.9		0.219198	0.722746	0.654657	0.548455	0.816744	0.541268
4	60400	144000	3800	8000	13610.4		15100	36000	950	2000	3402.6	57452.6		0.238993	0.944707	0.407205	0.650515	0.929672	0.561069
4	150900	96850	1200	10000	8948.4		37725	24212.5	300	2500	2237.1	66974.6		0.47068	0.880531	0.188477	0.69897	0.844652	0.540472
7	593420	200000	6000	15000	2026.92		84774.3	28571.4	857.143	2142.86	289.56	116635		0.675556	0.907314	0.387687	0.665497	0.430136	0.584158
6	70900	87960	6000	3800	5354.78		11816.7	14660	1000	633.333	892.464	29002.5		0.176952	0.799351	0.416938	0.400816	0.658345	0.434923
4	164500	89690	2400	5000	4132.56		41125	22422.5	600	1250	1033.14	66430.6		0.492515	0.868105	0.320006	0.548455	0.68802	0.552813
4	70590	48000	3500	2000	9517.97		17647.5	12000	875	500	2379.49	33402		0.278441	0.766958	0.3916	0.349485	0.857162	0.478374
6	81820	128000	3250	3000	10846.3		13636.7	21333.3	541.667	500	1807.72	37819.4		0.2132	0.860048	0.300598	0.349485	0.801445	0.43423
3	419516	176000	6320	2000	2898.14		139839	58666.7	2106.67	666.667	966.048	202245		0.8022	1.02372	0.558327	0.411954	0.674407	0.662254
4	459952	7896	27200	3000	3793.82		114988	1974	6800	750	948.456	125460		0.75269	0.474944	0.780686	0.437531	0.670681	0.60625
10	201470	8000	7000	10000	12895		20147	800	700	1000	1289.5	23936.5		0.311959	0.32881	0.349257	0.5	0.732957	0.420385
5	134300	8520	15000	1000	12858.7		26860	1704	3000	200	2571.73	34335.7		0.384727	0.451146	0.625406	0.150515	0.872914	0.427402
4	89460	184000	4586	1000	10663.5		22365	46000	1146.5	250	2665.88	72427.4		0.338386	0.984366	0.442881	0.19897	0.880203	0.481333
4	92528	1563	6000	3500	11481.8		23132	390.75	1500	875	2870.45	28768.2		0.346918	0.212877	0.493878	0.471004	0.895193	0.433894
4	91732	25470	48000	1000	11720.9		22933	6367.5	12000	250	2930.22	44480.7		0.344732	0.664428	0.888464	0.19897	0.899371	0.515536
4	371810	2567	48000	2000	8525.64		92952.5	641.75	12000	500	2131.41	108226		0.69886	0.293149	0.888464	0.349485	0.83484	0.555942
6	366370	5693	3600	1200	7794.07		61061.7	948.833	600	200	1299.01	64109.5		0.592533	0.356416	0.320006	0.150515	0.734447	0.375555
5	237860	60000	4560	3500	9789.72		47572	12000	912	700	1957.94	63141.9		0.529365	0.766958	0.399459	0.422549	0.81763	0.561935
6	147280	80000	8500	30000	9321		24546.7	13333.3	1416.67	5000	1553.5	45850.2		0.361938	0.784004	0.483032	0.849485	0.770719	0.617442
4	55450	7596	14000	5000	12070.9		13862.5	1899	3500	1250	3017.72	23529.2		0.217356	0.468677	0.654657	0.548455	0.905336	0.505827
4	76002	144000	3800	8000	13502.4		19000.5	36000	950	2000	3375.59	61326.1		0.297133	0.944707	0.407205	0.650515	0.928057	0.585839
4	83514	14752	3600	5680	10591.3		20878.5	3688	900	1420	2647.82	29534.3		0.320983	0.576069	0.396945	0.576144	0.878825	0.517636
4	340080	144000	1200	20000	3627.24		85020	36000	300	5000	906.81	127227		0.676288	0.944707	0.188477	0.849485	0.661578	0.583559
4	147260	78962	1480	23000	16336.8		36815	19740.5	370	5750	4084.19	66759.7		0.464502	0.847493	0.228273	0.879834	0.966689	0.597934
5	107316	5200	5000	1700	15909.2		21463.2	1040	1000	340	3181.84	27025		0.327972	0.371259	0.416938	0.265739	0.916073	0.415331
5	123951	78965	4566	12000	10818.4		24790.2	15793	913.2	2400	2163.69	46060.1		0.364437	0.811396	0.399708	0.690106	0.837887	0.584709
2	611150	25630	3200	12000	1641.12		305575	12815	1600	6000	820.56	326811		1	0.777589	0.506124	0.889076	0.641315	0.741658
4	91734	200000	3600	3500	8173.58		22933.5	50000	900	875	2043.4	76751.9		0.344738	0.997857	0.396945	0.471004	0.82629	0.556018
4	23688	2475	1922	7000	1183.32		5922	618.75	480.5	1750	295.83	9067.08		0.00214548	0.287244	0.277861	0.621519	0.43448	0.135833
5	42960	8962	2055	1000	444.552		8592	1792.4	411	200	88.9104	11084.3		0.0963148	0.45933	0.248214	0.150515	0.190755	0.199407
2	22560	9874	36000	3500	867.48		11280	4937	18000	1750	433.74	36400.7		0.165191	0.62326	0.965403	0.621519	0.51206	0.50122
5	38550	8963	7500	800	1786.99		7710	1792.6	1500	160	357.398	11520		0.0689076	0.459348	0.493878	0.10206	0.472811	0.237418
6	63260	1546	7200	5200	1321.06		10543.3	257.667	1200	866.667	220.176	13087.8		0.148102	0.145506	0.451535	0.468926	0.374599	0.279615
7	75760	3545	6000	3750	2946.84		10822.9	506.429	857.143	535.714	420.977	13143.1		0.154723	0.254833	0.387687	0.364467	0.506005	0.309044
5	79610	2684	24000	3700	4266.62		15922	536.8	4800	740	853.325	22852.1		0.252405	0.264256	0.714592	0.434616	0.649253	0.422416
6	55600	5685	1860	3500	2991.6		9266.67	947.5	310	583.333	498.6	11606.1		0.115442	0.356188	0.194699	0.382958	0.540313	0.27787
4	36868	13254	3600	2500	1709.45		9217	3313.5	900	625	427.362	14482.9		0.114083	0.558744	0.396945	0.39794	0.509057	0.348297
4	50700	9568	6000	3000	2118.77		12675	2392	1500	750	529.692	17846.7		0.194695	0.506019	0.493878	0.437531	0.552577	0.411253
3	27896	30256	500	500	778.296		9298.67	10085.3	166.667	166.667	259.432	19976.8		0.116315	0.738834	0.0769413	0.110924	0.407862	0.197322
4	160450	9254	48000	15000	1380.72		40112.5	2313.5	12000	3750	345.18	58521.2		0.486208	0.50062	0.888464	0.787016	0.465758	0.602314
2	27740	6956	6000	1260	589.666		13870	3478	3000	630	294.833	21272.8		0.217493	0.566583	0.625406	0.39967	0.433795	0.421863
3	52700	9568	4500	3000	1815.05		17566.7	3189.33	1500	1000	605.016	23861		0.277279	0.552565	0.493878	0.5	0.579533	0.465794
4	39150	1566	1200	3500	689.232		9787.5	391.5	300	875	172.308	11526.3		0.129279	0.213188	0.188477	0.471004	0.324899	0.239919
5	46460	3256	3600	1200	437.088		9292	651.2	720	240	87.4176	10990.6		0.116133	0.295514	0.354603	0.190106	0.187322	0.212506
3	25100	2562	1200	3500	663.312		8366.67	854	400	1166.67	221.104	11008.4		0.0895901	0.339379	0.243067	0.533473	0.375452	0.271686
4	56620	56000	9600	2500	3481.2		14155	14000	2400	625	870.3	32050.3		0.22264	0.791898	0.583064	0.39794	0.653246	0.484592
5	44020	7462	2400	3590	1686.07		8804	1492.4	480	718	337.213	11831.6		0.102483	0.429694	0.277663	0.428062	0.461024	0.299579
4	38050	1280	1800	3120	646.43		9512.5	320	450	780	161.608	11224.1		0.122068	0.180559	0.265417	0.446047	0.311901	0.241051
5	49750	1936	8500	1200	1482.24		9950	387.2	1700	240	296.448	12573.6		0.133446	0.211401	0.517628	0.190106	0.434903	0.260833
3	35640	8960	1200	3750	458.443		11880	2986.67	400	1250	152.814	16669.5		0.178305	0.541942	0.243067	0.548455	0.300558	0.329293
3	37220	8567	12000	2300	678.228		12406.7	2855.67	4000	766.667	226.076	20255.1		0.189281	0.534685	0.679996	0.442303	0.37996	0.409859
4	44600	2880	7200	5000	760.32		11150	720	1800	1250	190.08	15110.1		0.162258	0.311763	0.528474	0.548455	0.3448	0.347338
5	40950	7562	2400	2500	1077.41		8190	1512.4	480	500	215.482	10897.9		0.0841899	0.431848	0.277663	0.349485	0.37023	0.264973
6	64940	14557	60000	3710	2800.97		10823.3	2426.17	10000	618.333	466.828	24334.7		0.154734	0.508314	0.853867	0.395611	0.526964	0.425826
2	33330	2563	36000	17000	1492.1		16665	1281.5	18000	8500	746.052	45192.6		0.263946	0.405044	0.965403	0.964709	0.622016	0.573304
2	24708	7895	1600	7000	1583.93		12354	3947.5	800	3500	791.964	21393.5		0.188205	0.587071	0.374595	0.772034	0.634123	0.458499
8	69000	56000	1200	2800	1095.12		8625	7000	150	350	136.89	16261.9		0.0972848	0.679751	0.0569485	0.272034	0.278247	0.195428
5	45000	5460	1456	5500	431.088		9000	1092	291.2	1100	86.2176	11569.4		0.108054	0.379153	0.182828	0.520696	0.18452	0.235193
6	49300	1920	2400	3950	821.16		8216.67	320	400	658.333	136.86	9731.86		0.0850125	0.180559	0.243067	0.409223	0.278203	0.211656
4	36840	7520	2400	3600	663.36		9210	1880	600	900	165.84	12755.8		0.11389	0.46705	0.320006	0.477121	0.317142	0.303514
4	71120	1456	3500	2500	382.176		17780	364	875	625	95.544	19739.5		0.280334	0.201404	0.3916	0.39794	0.205344	0.282733
4	56508	9423	48000	3000	2348.64		14127	2355.75	12000	750	587.16	29819.9		0.222139	0.503549	0.888464	0.437531	0.57346	0.477929
6	78879	7896	28000	1560	2162.9		13146.5	1316	4666.67	260	360.484	19749.7		0.203937	0.409342	0.709247	0.207487	0.474554	0.357381
5	46340	1458	3200	3600	531.936		9268	291.6	640	720	106.387	11026		0.115479	0.165523	0.332253	0.428666	0.227138	0.228164
2	42500	7890	3600	1200	661.776		21250	3945	1800	600	330.888	27925.9		0.325446	0.586968	0.528474	0.389076	0.457185	0.447557
5	51748	4895	3600	7500	1076.81		10349.6	979	720	1500	215.362	13764		0.143409	0.36148	0.354603	0.588046	0.370117	0.331459
4	37480	3571	3600	5600	486.024		9370	892.75	900	1400	121.506	12684.3		0.118248	0.346558	0.396945	0.573064	0.254078	0.298466
6	145742	1316	1800	3560	861.792		24290.3	219.333	300	593.333	143.632	25546.6		0.359282	0.119445	0.188477	0.386649	0.287994	0.245987
12	84000	1258	38000	3560	3583.68		7000	104.833	3166.67	296.667	298.64	10866.8		0.0444623	5.14458e-06	0.635666	0.236134	0.436396	0.0272347
4	65766	1223	6000	1220	2703.5		16441.5	305.75	1500	305	675.876	19228.1		0.26053	0.173189	0.493878	0.24215	0.601988	0.317932
4	55210	7960	1686	9500	3136.06		13802.5	1990	421.5	2375	784.014	19373		0.216259	0.47625	0.253001	0.687832	0.632078	0.408166
5	98340	2370	1285	11000	1622.52		19668	474	257	2200	324.504	22923.5		0.30587	0.244126	0.159121	0.671211	0.453236	0.324797
5	151900	23014	6000	1200	354.84		30380	4602.8	1200	240	70.968	36493.8		0.415888	0.611919	0.451535	0.190106	0.145058	0.316359
4	32230	4963	3600	1000	2455.28		8057.5	1240.75	900	250	613.821	11062.1		0.0800628	0.399815	0.396945	0.19897	0.582463	0.271403
5	30860	8657	2500	1000	705.912		6172	1731.4	500	200	141.182	8744.58		0.0126082	0.453727	0.285409	0.150515	0.284507	0.147543
5	29360	1597	1800	3200	2305.03		5872	319.4	360	640	461.006	7652.41		0	0.180256	0.223074	0.40309	0.52442	0
6	38800	3521	48000	3900	872.256		6466.67	586.833	8000	650	145.376	15848.9		0.0244093	0.278675	0.811525	0.406457	0.290441	0.230571
4	41500	3510	3600	1500	1764.12		10375	877.5	900	375	441.03	12968.5		0.144029	0.343771	0.396945	0.287016	0.515439	0.310962
3	65780	8520	6800	30000	1941.6		21926.7	2840	2266.67	10000	647.2	37680.5		0.333378	0.533795	0.572217	1	0.593198	0.570446
3	46220	7830	9800	3500	2161.44		15406.7	2610	3266.67	1166.67	720.48	23170.5		0.24408	0.520131	0.641566	0.533473	0.614944	0.484582
4	45500	9710	1200	2200	405.36		11375	2427.5	300	550	101.34	14753.8		0.167313	0.508403	0.188477	0.370181	0.217284	0.264294
4	38608	1589	2400	2100	510.624		9652	397.25	600	525	127.656	11301.9		0.125751	0.215547	0.320006	0.36008	0.264088	0.241697
5	47836	8520	2400	3500	615.024		9567.2	1704	480	700	123.005	12574.2		0.123519	0.451146	0.277663	0.422549	0.256563	0.278566
4	40390	8965	1200	3000	640.68		10097.5	2241.25	300	750	160.17	13548.9		0.137169	0.495487	0.188477	0.437531	0.310089	0.280549
4	55300	5623	2000	5000	1411.31		13825	1405.75	500	1250	352.827	17333.6		0.216671	0.420016	0.285409	0.548455	0.470201	0.367445
3	60900	6523	24000	3500	3898.15		20300	2174.33	8000	1166.67	1299.38	32940.4		0.313873	0.490583	0.811525	0.533473	0.734506	0.546985
6	57300	6589	85000	6000	546.624		9550	1098.17	14166.7	1000	91.104	25905.9		0.123063	0.380064	0.919961	0.5	0.195697	0.334859
4	41480	9847	2400	2500	439.229		10370	2461.75	600	625	109.807	14166.6		0.143907	0.51067	0.320006	0.39794	0.233553	0.293709
4	45720	7462	24000	2410	751.728		11430	1865.5	6000	602.5	187.932	20085.9		0.168534	0.465797	0.756935	0.389979	0.342496	0.380126
4	45730	1280	2400	2630	169.32		11432.5	320	600	657.5	42.33	13052.3		0.168589	0.180559	0.320006	0.408948	0.0402957	0.174224
7	281525	1936	36000	6500	5963.23		40217.9	276.571	5142.86	928.571	851.89	47417.7		0.486871	0.156961	0.727684	0.483908	0.648911	0.445061
5	49140	8960	1200	3500	1099.92		9828	1792	240	700	219.984	12780		0.130324	0.459293	0.146134	0.422549	0.374422	0.268053
7	95624	8567	1800	3900	5812.2		13660.6	1223.86	257.143	557.143	830.314	16529		0.213643	0.397597	0.159226	0.372983	0.64371	0.317911
3	68168	2880	48000	7500	6560.45		22722.7	960	16000	2500	2186.82	44369.5		0.342401	0.358309	0.943053	0.69897	0.840043	0.584006
4	38660	7562	1200	3000	1837.03		9665	1890.5	300	750	459.258	13064.8		0.126092	0.467951	0.188477	0.437531	0.52365	0.302858
3	23600	1457	7800	380	642.312		7866.67	485.667	2600	126.667	214.104	11293.1		0.0739978	0.24806	0.598252	0.0513312	0.368929	0.183483
2	15800	2563	3620	1500	464.4		7900	1281.5	1810	750	232.2	11973.7		0.0750677	0.405044	0.529526	0.437531	0.385379	0.306724
5	48840	7895	2400	3500	676.752		9768	1579	480	700	135.35	12662.4		0.128774	0.43882	0.277663	0.422549	0.275954	0.283446
4	61280	56000	9600	2000	3147		15320	14000	2400	500	786.75	33006.8		0.242653	0.791898	0.583064	0.349485	0.632784	0.477321
6	66892	5460	25000	9500	3569.59		11148.7	910	4166.67	1583.33	594.932	18403.6		0.162228	0.349655	0.687742	0.599786	0.576126	0.422611
4	73886	1920	36000	1200	5428.66		18471.5	480	9000	300	1357.16	29608.7		0.289988	0.246161	0.833875	0.238561	0.743326	0.402435
5	50290	7520	3600	3000	571.68		10058	1504	720	600	114.336	12996.3		0.136177	0.430946	0.354603	0.389076	0.241747	0.287298
11	78270	1456	1800	6500	381.72		7115.45	132.364	163.636	590.909	34.7018	8037.07		0.0486017	0.0377326	0.0734594	0.38576	1.06227e-05	0.0140732
5	50900	9523	1800	1200	6369.24		10180	1904.6	360	240	1273.85	13958.4		0.139228	0.469153	0.223074	0.190106	0.730482	0.289214
5	45800	7896	1200	3500	968.496		9160	1579.2	240	700	193.699	11872.9		0.112513	0.43884	0.146134	0.422549	0.348624	0.254272
5	55850	1458	108000	3590	950.448		11170	291.6	21600	718	190.09	33969.7		0.162712	0.165523	1	0.428062	0.34481	0.331034
7	157940	7890	36000	9500	11623.6		22562.9	1127.14	5142.86	1357.14	1660.51	31850.5		0.340615	0.384278	0.727684	0.566313	0.784224	0.531214
4	144480	4895	6012	8000	722.712		36120	1223.75	1503	2000	180.678	41027.4		0.459679	0.397583	0.494257	0.650515	0.334515	0.455724
4	39600	3571	1785	3500	667.445		9900	892.75	446.25	875	166.861	12280.9		0.132171	0.346558	0.263829	0.471004	0.318386	0.282906
3	34190	5896	1350	1500	1099.7		11396.7	1965.33	450	500	366.568	14678.6		0.167795	0.474232	0.265417	0.349485	0.477947	0.323222
5	47940	4562	2400	3500	783.192		9588	912.4	480	700	156.638	11837		0.124068	0.350081	0.277663	0.422549	0.305569	0.274452
4	40160	25630	1200	3000	576.6		10040	6407.5	300	750	144.15	17641.7		0.135724	0.665442	0.188477	0.437531	0.288724	0.292754
														46.9501	84.8455	74.9494	77.2491	100.312	74.6201
														0.279465	0.505033	0.446128	0.459816	0.597095	0.444167
														0.0172875
													HWI	0.444167

## Sheet: SheetB
		Remittance recipient
	per capita exp
food and non-food	house	edu	hel	invest	PCE	Pov.status	CI	AC	EI	HI	II	HWI
26753.3	40000	666.667	853.333	1240.29	69513.6	0	0.362084	0.934089	0.36053	0.523644	0.587825	0.518662
18511	1250	10000	700	419.736	30880.7	0	0.26562	0.337652	0.905429	0.475268	0.258508	0.397924
18395	1856.3	600	100	1483.66	22435	0	0.263974	0.405706	0.33933	0	0.642283	0
13305	2380	1625	1000	1960.32	20270.3	0	0.179128	0.448474	0.539806	0.562382	0.72696	0.446412
18112.5	2243.5	3000	1145	1838.98	26340	0	0.25992	0.43831	0.663172	0.595453	0.707538	0.501844
12613	21333.3	206.667	500	1841.93	36494.9	0	0.165138	0.825908	0.124871	0.393088	0.708026	0.342891
9000	16000	111.111	222.222	1105.65	26439	0	0.0767391	0.7764	2.01215e-06	0.195027	0.552899	0.0264424
9412.5	24000	250	2140	1297.5	37100	0	0.0884768	0.846178	0.163173	0.748201	0.601532	0.353218
66980.7	3661.43	1142.86	285.714	334.539	72405.3	0	0.60246	0.522605	0.468984	0.256408	0.189551	0.372549
14840	48000	1724	4000	1311.42	69875.4	0	0.207726	0.965466	0.551706	0.900969	0.604774	0.570227
17688	1136.2	9600	400	1250.25	30074.5	0	0.253709	0.321225	0.897215	0.338588	0.590257	0.429488
13518	20800	1200	400	1036.86	36954.9	0	0.183288	0.821551	0.478801	0.338588	0.533373	0.419687
15657.5	21057.5	3000	250	1399.62	41364.6	0	0.221771	0.823669	0.663172	0.223794	0.624559	0.442325
25450	4080	3000	5000	1709.28	39239.3	0	0.349003	0.541233	0.663172	0.95547	0.685309	0.606441
20636	240	250	1120	1649.23	23895.2	0	0.294084	0.0536502	0.163173	0.590061	0.674439	0.25241
138299	58666.7	666.667	666.667	645.792	198944	0	0.792355	1	0.36053	0.463351	0.389464	0.552647
116750	31474	6800	750	179.304	155953	0	0.747991	0.892835	0.827828	0.492119	-1.01707e-05	-0.0773402
25149	46000	307.5	250	1635.59	73342.1	0	0.345887	0.958141	0.204827	0.223794	0.671915	0.399745
14000	1877.33	800	1000	2931.19	20608.5	0	0.192464	0.407645	0.397216	0.562382	0.849238	0.431066
80600	13530.8	1200	1950	418.974	97699.7	0	0.65094	0.747552	0.478801	0.725492	0.257956	0.534445
33029.5	720	1550	3000	2253.05	40552.5	0	0.417282	0.242716	0.530298	0.830706	0.769262	0.509465
59340	640.75	1500	875	880.062	63235.8	0	0.570736	0.222648	0.523701	0.529768	0.483539	0.442926
10382.9	387.214	428.571	357.143	355.531	11911.3	0	0.114176	0.13597	0.271627	0.310908	0.208049	0.193713
85172	1723.75	12000	500	2389.91	101786	0	0.665391	0.392956	0.942114	0.393088	0.787186	0.597611
14977	1130.25	12000	250	2177.95	30535.2	0	0.210133	0.320321	0.942114	0.223794	0.758958	0.404064
25916.7	13333.3	246.667	500	1288.52	41285.2	0	0.353762	0.745023	0.160472	0.393088	0.599421	0.397833
14690	1465.5	1800	1250	2152.16	21357.7	0	0.205065	0.365024	0.560386	0.616882	0.755338	0.455207
13017.5	1646.75	380	2240	1743.38	19027.6	0	0.173406	0.385092	0.247423	0.759355	0.691313	0.386935
57758.3	1494.17	600	2000	1270.81	63123.3	0	0.56366	0.368358	0.33933	0.731676	0.595215	0.498173
43600	12000	272	700	2011.87	58583.9	0	0.490005	0.726891	0.180144	0.475268	0.73485	0.467827
39077.1	25142.9	5142.86	242.857	1792.22	71397.9	0	0.46132	0.854184	0.771626	0.216714	0.69971	0.540447
37016.7	4121	16000	4000	1813.1	62950.8	0	0.447132	0.542954	1	0.900969	0.703231	0.687703
13950	590.75	307.5	1500	1908.98	18257.2	0	0.191527	0.208666	0.204827	0.661412	0.718894	0.329641
29235	12800	6000	317	1440.19	49792.2	0	0.385318	0.737998	0.802643	0.281787	0.633244	0.527203
17412.5	3140.75	2350	5000	1922.93	29826.2	0	0.249597	0.496207	0.614036	0.95547	0.721107	0.55445
28580	32000	4000	600	1587	66767	0	0.379383	0.895687	0.721058	0.437618	0.662748	0.589291
73210	11294	370	600	751.968	86226	0	0.625752	0.716456	0.242057	0.437618	0.435729	0.460431
21783.3	2093.33	208.333	2083.33	1267.32	27435.7	0	0.308256	0.426387	0.126487	0.741646	0.594378	0.374114
15650	1300.25	1500	1400	1682.01	21532.3	0	0.221645	0.344435	0.523701	0.644562	0.680421	0.445429
11885.7	175.714	857.143	714.286	1008.55	14641.4	0	0.149582	-5.5965e-06	0.411098	0.480202	0.52496	-0.0386953
17180	330	304	4000	1462.97	23277	0	0.246076	0.108455	0.202524	0.900969	0.638015	0.315113
8775	270	412.5	1212.5	1902.48	12572.5	0	0.0701078	0.0739201	0.263936	0.609443	0.717857	0.226673
11612.5	8000	3600	3750	3134.1	30096.6	0	0.143491	0.657112	0.699858	0.885207	0.869582	0.551018
298630	1300.5	600	6000	3611.27	310142	0	0.993978	0.344468	0.33933	1	0.912656	0.638397
6714.29	802.857	1028.57	142.857	1196.9	9885.47	0	-1.67183e-07	0.261462	0.447784	0.0871141	0.577002	-0.0157974
17033.3	16000	1066.67	1000	2185.28	37285.3	0	0.24383	0.7764	0.455101	0.562382	0.75998	0.516681
75650	7028.75	125	187.5	707.49	83698.7	0	0.634339	0.634837	0.0237017	0.153531	0.417198	0.227646
32120	2632	2066.67	540	3303.07	40661.7	0	0.409968	0.465794	0.588184	0.411885	0.885542	0.527823
22800	2884.67	1620	400	3174.35	30879	0	0.320203	0.481569	0.539186	0.338588	0.87346	0.476593
14925	640.75	6250	405	1645.23	23866	0	0.209222	0.222648	0.810857	0.341622	0.673701	0.387112
24068	825	2400	2400	2636.57	32329.6	0	0.334379	0.266144	0.618272	0.776206	0.817041	0.511153
18380	251.2	720	3000	1230.16	23581.4	0	0.26376	0.0614996	0.376015	0.830706	0.585334	0.312196
20020	1040	1000	2970	1868.91	26898.9	0	0.286146	0.306	0.442115	0.828252	0.712446	0.469626
33200	3090.75	395	5750	4813.51	47249.3	0	0.41863	0.493445	0.255213	0.989605	1	0.553971
20925	36000	3000	500	2832.9	63257.9	0	0.297726	0.915957	0.663172	0.393088	0.838871	0.568985
12608.5	3640.75	900	1125	3972.5	22246.7	0	0.165045	0.52163	0.420915	0.591149	0.941633	0.458086
13963.8	9130.75	3500	1250	1949.41	29793.9	0	0.191785	0.679864	0.694189	0.616882	0.725264	0.526602
15100	36000	950	2000	3402.6	57452.6	0	0.212275	0.915957	0.431794	0.731676	0.894565	0.559753
37725	24212.5	300	2500	2237.1	66974.6	0	0.452096	0.847695	0.199859	0.786176	0.767103	0.540647
84774.3	28571.4	857.143	2142.86	289.56	116635	0	0.664165	0.876184	0.411098	0.748526	0.145665	0.482254
11816.7	14660	1000	633.333	892.464	29002.5	0	0.148056	0.761347	0.442115	0.450823	0.487793	0.405469
41125	22422.5	600	1250	1033.14	66430.6	0	0.474698	0.834478	0.33933	0.616882	0.532282	0.535747
17647.5	12000	875	500	2379.49	33402	0	0.253108	0.726891	0.415247	0.393088	0.785859	0.472697
13636.7	21333.3	541.667	500	1807.72	37819.4	0	0.185577	0.825908	0.31875	0.393088	0.702328	0.422656
139839	58666.7	2106.67	666.667	966.048	202245	0	0.795255	1	0.592041	0.463351	0.511873	0.64504
114988	1974	6800	750	948.456	125460	0	0.744008	0.416286	0.827828	0.492119	0.506288	0.576866
20147	800	700	1000	1289.5	23936.5	0	0.287802	0.260848	0.370347	0.562382	0.599651	0.393011
26860	1704	3000	200	2571.73	34335.7	0	0.363126	0.390973	0.663172	0.169294	0.809473	0.418924
22365	46000	1146.5	250	2665.88	72427.4	0	0.315158	0.958141	0.469624	0.223794	0.820402	0.482077
23132	390.75	1500	875	2870.45	28768.2	0	0.32399	0.137534	0.523701	0.529768	0.842874	0.401398
22933	6367.5	12000	250	2930.22	44480.7	0	0.321727	0.617834	0.942114	0.223794	0.849137	0.513166
92952.5	641.75	12000	500	2131.41	108226	0	0.688287	0.222916	0.942114	0.393088	0.752393	0.532341
61061.7	948.833	600	200	1299.01	64109.5	0	0.578227	0.290211	0.33933	0.169294	0.601886	0.357041
47572	12000	912	700	1957.94	63141.9	0	0.512841	0.726891	0.42358	0.475268	0.726592	0.558886
24546.7	13333.3	1416.67	5000	1553.5	45850.2	0	0.339537	0.745023	0.5122	0.95547	0.656263	0.605283
13862.5	1899	3500	1250	3017.72	23529.2	0	0.189879	0.40962	0.694189	0.616882	0.858081	0.491149
19000.5	36000	950	2000	3375.59	61326.1	0	0.272456	0.915957	0.431794	0.731676	0.892143	0.588085
20878.5	3688	900	1420	2647.82	29534.3	0	0.297144	0.523849	0.420915	0.648026	0.818335	0.510715
85020	36000	300	5000	906.81	127227	0	0.664923	0.915957	0.199859	0.95547	0.49264	0.564447
36815	19740.5	370	5750	4084.19	66759.7	0	0.445701	0.812554	0.242057	0.989605	0.950061	0.607023
21463.2	1040	1000	340	3181.84	27025	0	0.304378	0.306	0.442115	0.298894	0.874177	0.403978
24790.2	15793	913.2	2400	2163.69	46060.1	0	0.342123	0.774159	0.423845	0.776206	0.756961	0.580569
305575	12815	1600	6000	820.56	326811	0	1	0.738199	0.536687	1	0.462262	0.712125
22933.5	50000	900	875	2043.4	76751.9	0	0.321732	0.972491	0.420915	0.529768	0.739576	0.55275
							30.4128	47.3914	40.1838	46.2276	55.3962	43.0762
							0.362058	0.564183	0.478379	0.550329	0.659478	0.512812
							0.0354644
						HWI	0.512812

## Sheet: SheetC
		Remittance non-recipient
	per capita exp
food and non-food	house	edu	hel	invest	PCE	Pov.status	CI	AC	EI	HI	II	HWI
5922	618.75	480.5	1750	295.83	9067.08	1	0.00440667	0.362728	0.234253	0.601038	0.517211	0.163376
8592	1792.4	411	200	88.9104	11084.3	1	0.197824	0.580036	0.202816	0.104545	0.227078	0.223081
11280	4937	18000	1750	433.74	36400.7	1	0.339291	0.787046	0.963314	0.601038	0.609564	0.623523
7710	1792.6	1500	160	357.398	11520	1	0.141531	0.580059	0.463314	0.053468	0.562841	0.258069
10543.3	257.667	1200	866.667	220.176	13087.8	1	0.304191	0.183743	0.418414	0.440187	0.445928	0.340701
10822.9	506.429	857.143	535.714	420.977	13143.1	1	0.31779	0.3218	0.350711	0.330075	0.602356	0.372073
15922	536.8	4800	740	853.325	22852.1	0	0.518423	0.3337	0.697357	0.40402	0.77288	0.519042
9266.67	947.5	310	583.333	498.6	11606.1	1	0.237111	0.44979	0.146069	0.349567	0.643197	0.322759
9217	3313.5	900	625	427.362	14482.9	1	0.234318	0.705576	0.360529	0.36536	0.605989	0.420818
12675	2392	1500	750	529.692	17846.7	0	0.399891	0.638995	0.463314	0.407093	0.657796	0.501441
9298.67	10085.3	166.667	166.667	259.432	19976.8	1	0.238902	0.932991	0.0212001	0.0628121	0.485525	0.170505
40112.5	2313.5	12000	3750	345.18	58521.2	0	0.998637	0.632178	0.881729	0.77549	0.554446	0.751283
13870	3478	3000	630	294.833	21272.8	1	0.446716	0.715475	0.602786	0.367183	0.516396	0.515859
17566.7	3189.33	1500	1000	605.016	23861	0	0.569512	0.697772	0.463314	0.472943	0.689885	0.569817
9787.5	391.5	300	875	172.308	11526.3	1	0.26553	0.269211	0.139471	0.442377	0.386764	0.279503
9292	651.2	720	240	87.4176	10990.6	1	0.23853	0.373171	0.315629	0.146278	0.222991	0.246842
8366.67	854	400	1166.67	221.104	11008.4	1	0.184012	0.428563	0.197357	0.508227	0.446943	0.323359
14155	14000	2400	625	870.3	32050.3	0	0.457287	1	0.557886	0.36536	0.777634	0.591624
8804	1492.4	480	718	337.213	11831.6	1	0.210492	0.542612	0.234043	0.397112	0.54881	0.357331
9512.5	320	450	780	161.608	11224.1	1	0.250718	0.228008	0.221057	0.41607	0.371291	0.287147
9950	387.2	1700	240	296.448	12573.6	1	0.274088	0.266954	0.488499	0.146278	0.517715	0.306544
11880	2986.67	400	1250	152.814	16669.5	1	0.366226	0.684358	0.197357	0.52402	0.357789	0.39215
12406.7	2855.67	4000	766.667	226.076	20255.1	1	0.38877	0.675194	0.660672	0.412124	0.45231	0.503401
11150	720	1800	1250	190.08	15110.1	1	0.333267	0.393691	0.5	0.52402	0.410455	0.426487
8190	1512.4	480	500	215.482	10897.9	1	0.17292	0.545332	0.234043	0.314282	0.440727	0.314093
10823.3	2426.17	10000	618.333	466.828	24334.7	0	0.317813	0.641893	0.845043	0.362905	0.627306	0.523308
16665	1281.5	18000	8500	746.052	45192.6	0	0.542127	0.511484	0.963314	0.9628	0.740457	0.717707
12354	3947.5	800	3500	791.964	21393.5	1	0.386559	0.741346	0.336829	0.759698	0.75487	0.560573
8625	7000	150	350	136.89	16261.9	1	0.199816	0.858382	0	0.23264	0.33123	0
9000	1092	291.2	1100	86.2176	11569.4	1	0.221935	0.47879	0.133481	0.494759	0.219655	0.273896
8216.67	320	400	658.333	136.86	9731.86	1	0.17461	0.228008	0.197357	0.377253	0.331177	0.250261
9210	1880	600	900	165.84	12755.8	1	0.233923	0.589785	0.278943	0.448826	0.37753	0.365479
17780	364	875	625	95.544	19739.5	1	0.575786	0.254331	0.35486	0.36536	0.244445	0.341447
14127	2355.75	12000	750	587.16	29819.9	0	0.456258	0.635875	0.881729	0.407093	0.682655	0.589335
13146.5	1316	4666.67	260	360.484	19749.7	1	0.418873	0.516912	0.691689	0.1646	0.564916	0.425368
9268	291.6	640	720	106.387	11026	1	0.237185	0.20902	0.291929	0.397749	0.270389	0.274429
21250	3945	1800	600	330.888	27925.9	1	0.668443	0.741217	0.5	0.356015	0.54424	0.544813
10349.6	979	720	1500	215.362	13764	1	0.294552	0.456472	0.315629	0.565753	0.440592	0.402609
9370	892.75	900	1400	121.506	12684.3	1	0.242874	0.43763	0.360529	0.54996	0.302458	0.363819
24290.3	219.333	300	593.333	143.632	25546.6	1	0.737941	0.150834	0.139471	0.353458	0.342833	0.285026
7000	104.833	3166.67	296.667	298.64	10866.8	1	0.0913224	6.49651e-06	0.613665	0.194798	0.519493	0.032604
16441.5	305.75	1500	305	675.876	19228.1	0	0.53511	0.218701	0.463314	0.201139	0.716615	0.378957
13802.5	1990	421.5	2375	784.014	19373	0	0.44418	0.601403	0.207892	0.670939	0.752435	0.489264
19668	474	257	2200	324.504	22923.5	0	0.628235	0.30828	0.108342	0.653419	0.539538	0.374814
30380	4602.8	1200	240	70.968	36493.8	1	0.854205	0.772725	0.418414	0.146278	0.172679	0.370444
8057.5	1240.75	900	250	613.821	11062.1	0	0.164443	0.504882	0.360529	0.155622	0.693372	0.317568
6172	1731.4	500	200	141.182	8744.58	1	0.0258964	0.572962	0.242257	0.104545	0.338681	0.166321
5872	319.4	360	640	461.006	7652.41	1	0	0.227625	0.176157	0.370788	0.624278	0
6466.67	586.833	8000	650	145.376	15848.9	1	0.050135	0.351907	0.800143	0.374337	0.345745	0.283368
10375	877.5	900	375	441.03	12968.5	1	0.295826	0.434109	0.360529	0.248432	0.613586	0.371306
21926.7	2840	2266.67	10000	647.2	37680.5	0	0.684734	0.67407	0.546385	1	0.706152	0.708149
15406.7	2610	3266.67	1166.67	720.48	23170.5	0	0.501324	0.656816	0.619921	0.508227	0.732039	0.59717
11375	2427.5	300	550	101.34	14753.8	1	0.34365	0.642005	0.139471	0.336099	0.258658	0.305821
9652	397.25	600	525	127.656	11301.9	1	0.258285	0.27219	0.278943	0.32545	0.314375	0.288725
9567.2	1704	480	700	123.005	12574.2	1	0.253698	0.569703	0.234043	0.3913	0.305417	0.332149
10097.5	2241.25	300	750	160.17	13548.9	1	0.281736	0.625695	0.139471	0.407093	0.369135	0.326222
13825	1405.75	500	1250	352.827	17333.6	1	0.445027	0.530391	0.242257	0.52402	0.559734	0.441487
20300	2174.33	8000	1166.67	1299.38	32940.4	0	0.644673	0.619502	0.800143	0.508227	0.874366	0.6768
9550	1098.17	14166.7	1000	91.104	25905.9	1	0.252763	0.479941	0.915127	0.472943	0.23296	0.414471
10370	2461.75	600	625	109.807	14166.6	1	0.295576	0.644868	0.278943	0.36536	0.278025	0.351959
11430	1865.5	6000	602.5	187.932	20085.9	1	0.346157	0.588203	0.742257	0.356967	0.407712	0.466087
11432.5	320	600	657.5	42.33	13052.3	1	0.346271	0.228008	0.278943	0.376963	0.0479686	0.208943
40217.9	276.571	5142.86	928.571	851.89	47417.7	0	1	0.198209	0.71124	0.455979	0.772474	0.548522
9828	1792	240	700	219.984	12780	1	0.267676	0.57999	0.0945717	0.3913	0.445718	0.30316
13660.6	1223.86	257.143	557.143	830.314	16529	0	0.438808	0.502081	0.108454	0.339052	0.766283	0.361901
22722.7	960	16000	2500	2186.82	44369.5	0	0.703267	0.452468	0.939615	0.68268	1	0.727738
9665	1890.5	300	750	459.258	13064.8	1	0.258984	0.590923	0.139471	0.407093	0.623361	0.352164
7866.67	485.667	2600	126.667	214.104	11293.1	1	0.151986	0.313248	0.573992	-6.02356e-06	0.439179	-0.0373094
7900	1281.5	1810	750	232.2	11973.7	1	0.154184	0.511484	0.501115	0.407093	0.458761	0.374643
9768	1579	480	700	135.35	12662.4	1	0.264494	0.554137	0.234043	0.3913	0.3285	0.337967
15320	14000	2400	500	786.75	33006.8	0	0.498392	1	0.557886	0.314282	0.753276	0.580334
11148.7	910	4166.67	1583.33	594.932	18403.6	0	0.333205	0.44154	0.668886	0.578129	0.685829	0.522703
18471.5	480	9000	300	1357.16	29608.7	0	0.595616	0.31085	0.823843	0.197355	0.884867	0.484281
10058	1504	720	600	114.336	12996.3	1	0.279699	0.544194	0.315629	0.356015	0.287779	0.345485
7115.45	132.364	163.636	590.909	34.7018	8037.07	1	0.0998245	0.0476482	0.017508	0.352521	1.26454e-05	0.0129995
10180	1904.6	360	240	1273.85	13958.4	1	0.285965	0.592441	0.176157	0.146278	0.869576	0.327996
9160	1579.2	240	700	193.699	11872.9	1	0.231094	0.554163	0.0945717	0.3913	0.415007	0.287575
11170	291.6	21600	718	190.09	33969.7	0	0.334198	0.20902	1	0.397112	0.410467	0.40858
22562.9	1127.14	5142.86	1357.14	1660.51	31850.5	0	0.699599	0.485262	0.71124	0.542844	0.933553	0.656948
36120	1223.75	1503	2000	180.678	41027.4	0	0.944149	0.502063	0.463716	0.631603	0.398212	0.560431
9900	892.75	446.25	875	166.861	12280.9	1	0.27147	0.43763	0.219373	0.442377	0.379012	0.337358
11396.7	1965.33	450	500	366.568	14678.6	1	0.344639	0.598855	0.221057	0.314282	0.568955	0.382224
9588	912.4	480	700	156.638	11837	1	0.254827	0.442078	0.234043	0.3913	0.363754	0.327244
10040	6407.5	300	750	144.15	17641.7	1	0.278768	0.840312	0.139471	0.407093	0.343701	0.340415
							30.2332	42.0136	34.219	33.5598	42.1305	36.117
							0.359919	0.500161	0.407369	0.399521	0.501554	0.429964
							0.0146947
						HWI	0.429964

## Sheet: SheetD
	Data for Regression
HWI	per capita income	age	sex	education	HS	occupation	land	Remittance
0.531352	38083.3	32	0	8	4	0	3	1
0.462862	30015	39	1	6	6	0	6	1
0	2029.9	26	1	5	5	1	1	1
0.465116	20127.6	50	1	0	4	0	4	1
0.51898	19404.2	38	0	8	4	0	4	1
0.35342	18767.2	45	1	3	3	0	3	1
0.0289391	1681.27	40	0	8	4	0	4	1
0.379662	16550	61	1	10	5	1	5	1
0.439521	16318.8	69	1	0	4	1	1.75	1
0.589793	16241.9	66	1	11	4	1	7	1
0.456906	15316.2	52	1	8	4	1	3	1
0.442195	15070	63	1	8	5	1	12	1
0.45666	14871.9	63	1	8	5	1	12	1
0.620895	14582.2	45	1	12	6	0	8	1
0.30624	13675.3	52	0	10	4	0	4	1
0.584022	13669.2	22	1	12	5	1	9	1
0.602533	13636.9	60	1	5	5	0	12	1
0.404863	13603.8	42	1	0	10	0	3.5	1
0.444178	13330.8	30	0	10	4	0	8	1
0.598298	13320.8	32	0	9	4	0	4	1
0.531915	13162.5	57	1	3	5	1	0	1
0.482461	13129.2	19	1	12	5	1	3	1
0.252108	1935	72	1	0	6	0	6	1
0.60593	12187.5	58	1	6	5	0	12	1
0.422875	12125	32	0	0	4	0	0.5	1
0.408788	12023.5	28	0	0	4	0	0	1
0.474352	11897.1	45	1	0	5	0	2	1
0.407445	11700	60	1	10	5	1	5	1
0.519365	11654.7	55	1	0	4	0	3	1
0.470228	11650.9	54	1	5	6	0	8	1
0.544079	11629.2	47	1	12	4	1	4	1
0.699672	11576.6	30	0	10	3	0	6	1
0.355184	11434.4	52	1	5	4	0	5	1
0.538375	11390.3	57	1	9	5	1	5	1
0.570777	11170.8	59	1	3	7	1	7	1
0.597267	11108.3	33	0	12	4	0	10	1
0.484777	11014.7	57	1	5	4	1	3	1
0.391691	10942.1	58	0	8	4	0	5	1
0.46822	10847.3	54	1	5	7	0	8	1
0.278851	10700.9	46	1	0	4	0	1	1
0.357616	10512.8	42	1	0	10	0	3.5	1
0.279428	1267.2	52	1	10	4	0	4	1
0.564635	9996	61	1	8	2	0	8	1
0.641369	9925.42	57	1	7	4	1	10	1
0.192203	2744.67	43	1	0	5	0	3.5	1
0.524016	9733.83	18	1	12	4	1	2	1
0.241455	9566.92	40	0	5	4	0	4	1
0.530632	9561.5	58	1	5	6	0	8	1
0.481202	9283.33	55	1	5	8	0	2.5	1
0.416691	9277.78	56	1	8	4	0	5	1
0.530687	9089.17	58	1	8	6	0	8	1
0.37817	9085.49	42	1	0	5	0	3.5	1
0.491186	9073.25	28	1	9	3	0	0	1
0.55107	9062.5	32	0	0	3	0	0	1
0.568264	9037.08	61	1	8	2	0	8	1
0.467175	9030	39	1	9	6	0	6	1
0.541268	9002.1	47	0	12	4	1	4	1
0.561069	8575.1	36	0	9	4	0	0	1
0.540472	8427.08	70	1	9	9	1	15	1
0.584158	8332.5	75	1	0	7	0	28	1
0.434923	8281.5	50	1	8	4	1	4	1
0.552813	8252.08	23	1	8	5	0	3	1
0.478374	8190.21	24	1	17	3	1	3	1
0.43423	7990.75	26	0	10	4	0	1	1
0.662254	7807.08	30	0	10	3	0	6	1
0.60625	7580.33	45	1	12	4	0	8	1
0.420385	7564.33	56	1	8	5	0	5	1
0.427402	7495	32	0	0	4	0	0.5	1
0.481333	7494.5	19	1	12	5	1	3	1
0.433894	7493.75	63	1	1	5	1	6	1
0.515536	7488.75	30	0	8	4	0	4	1
0.555942	7167.49	52	1	7	6	1	2	1
0.375555	7148.5	42	1	0	9	0	3.5	1
0.561935	7066.67	41	0	8	4	1	0	1
0.617442	6897.6	45	1	0	4	0	8	1
0.505827	6897.54	53	1	12	4	1	4	1
0.585839	6838.44	66	1	3	4	1	7	1
0.517636	6743.17	38	0	8	4	0	4	1
0.583559	6593.37	60	0	4	5	0	4	1
0.597934	6581.11	33	0	12	3	0	10	1
0.415331	6364.68	28	0	0	4	0	0	1
0.584709	6294.33	32	0	9	4	0	4	1
0.741658	6134	57	1	9	4	1	5	1
0.556018	6046.54	50	1	7	6	1	2	1
0.135833	5950.19	44	1	2	5	0	2	0
0.199407	5620.21	47	1	3	5	0	3	0
0.50122	5441.33	37	1	17	4	1	2.5	0
0.237418	5416.77	42	1	0	3	1	0	0
0.279615	5333.33	42	0	3	4	0	0	0
0.309044	4879.95	41	0	2	3	0	1.5	0
0.422416	4796.17	57	1	12	6	0	6	0
0.27787	4637.98	36	0	3	6	1	1.5	0
0.348297	4474.81	43	0	4	4	0	3	0
0.411253	4459.38	42	1	7	3	0	3	0
0.197322	4372.5	47	1	3	5	0	3	0
0.602314	4271.35	25	1	14	3	1	17	0
0.421863	4191.26	32	1	17	5	1	7	0
0.465794	8038.75	67	1	0	6	0	3	0
0.239919	4031.25	42	1	0	3	1	0	0
0.212506	3995.83	53	1	0	4	0	1	0
0.271686	3892.81	47	1	5	5	0	3	0
0.484592	3609.92	59	1	11	5	0	13	0
0.299579	3549.79	39	1	5	4	0	0	0
0.241051	3475	42	1	4	4	0	2	0
0.260833	3282.29	36	0	3	4	0	2	0
0.329293	3010	49	1	3	6	0	2	0
0.409859	3002.01	28	1	17	4	1	13	0
0.347338	2867.44	22	1	4	3	1	2	0
0.264973	2788.82	47	1	3	5	0	3	0
0.425826	2656.88	41	0	8	2	0	0	0
0.573304	2640.16	26	1	7	5	1	1.5	0
0.458499	2575.31	52	1	9	4	1	8	0
0.195428	2532.88	33	1	4	5	1	2	0
0.235193	2521.9	56	1	3	5	0	4	0
0.211656	2406.83	41	0	3	4	0	2	0
0.303514	2293.96	41	0	0	3	0	1.5	0
0.282733	2200	38	1	3	4	0	0	0
0.477929	2197.46	43	0	3	2	0	2.5	0
0.357381	2171.18	47	1	0	3	0	1	0
0.228164	2052.43	33	1	6	5	0	3	0
0.447557	9018.75	29	1	0	5	1	0	0
0.331459	1917.62	52	0	0	2	0	0	0
0.298466	1876.83	51	1	3	4	0	2	0
0.245987	1849.47	42	1	0	4	0	2	0
0.0272347	1836.81	67	1	4	6	0	2	0
0.317932	1813.4	38	1	14	7	1	13	0
0.408166	1810.5	39	1	3	4	0	2.5	0
0.324797	1758.12	35	1	0	4	0	1	0
0.316359	1708.33	39	0	5	5	0	2.5	0
0.271403	1666.67	42	1	5	4	0	2	0
0.147543	1666.67	41	1	3	5	0	3	0
0	625	59	1	0	11	0	3	0
0.230571	1618.19	56	1	3	5	0	4	0
0.310962	1374.44	42	1	6	5	0	3	0
0.570446	9312.5	29	1	17	4	1	3.5	0
0.484582	7274.79	43	0	3	2	0	2.5	0
0.264294	1263.88	36	0	3	4	0	2	0
0.241697	1245.28	50	1	0	4	0	0	0
0.278566	1231.32	26	1	3	5	1	1	0
0.280549	1225	48	1	0	4	1	0	0
0.367445	1218.02	45	1	0	3	0	1	0
0.546985	91212.8	31	1	15	4	1	9	0
0.334859	1207.17	27	1	9	6	1	2.5	0
0.293709	1193.01	57	1	8	6	0	6	0
0.380126	1156.25	22	1	5	3	1	2	0
0.174224	1148.33	39	1	2	5	0	0	0
0.445061	8125	61	1	4	6	1	1.5	0
0.268053	1065.69	36	0	3	4	0	2	0
0.317911	1050.54	45	1	2	4	1	2	0
0.584006	1047.97	61	1	3	2	1	3	0
0.302858	1041.67	39	0	5	4	0	0	0
0.183483	1023.62	33	1	4	5	1	2	0
0.306724	1005.62	39	1	4	3	0	3	0
0.283446	976.996	71	1	0	12	1	7	0
0.477321	962.179	57	1	0	4	0	4	0
0.422611	6937.19	57	1	12	6	0	6	0
0.402435	2868.44	23	1	3	4	0	1.5	0
0.287298	865.617	27	1	0	5	1	0	0
0.0140732	846.15	23	1	3	4	1	0	0
0.289214	828.653	37	1	8	7	0	8	0
0.254272	800.633	42	1	0	4	0	2	0
0.331034	767	52	0	0	2	0	0	0
0.531214	748.9	32	1	17	7	1	8	0
0.455724	9676.5	36	1	8	6	1	0	0
0.282906	650.538	56	1	5	5	0	4	0
0.323222	625	67	1	3	2	1	0	0
0.274452	610.5	37	1	3	5	0	0	0
0.292754	605.067	57	1	8	6	0	6	0
